# Supplementary material for: Cohesin is required for expression of the estrogen receptor-alpha (ESR1) gene
Source: PubMed Central journal article supplement (PMC3488477; doi:10.1186/1756-8935-5-13), 2012-08-22

Supplementary Figure 1

A

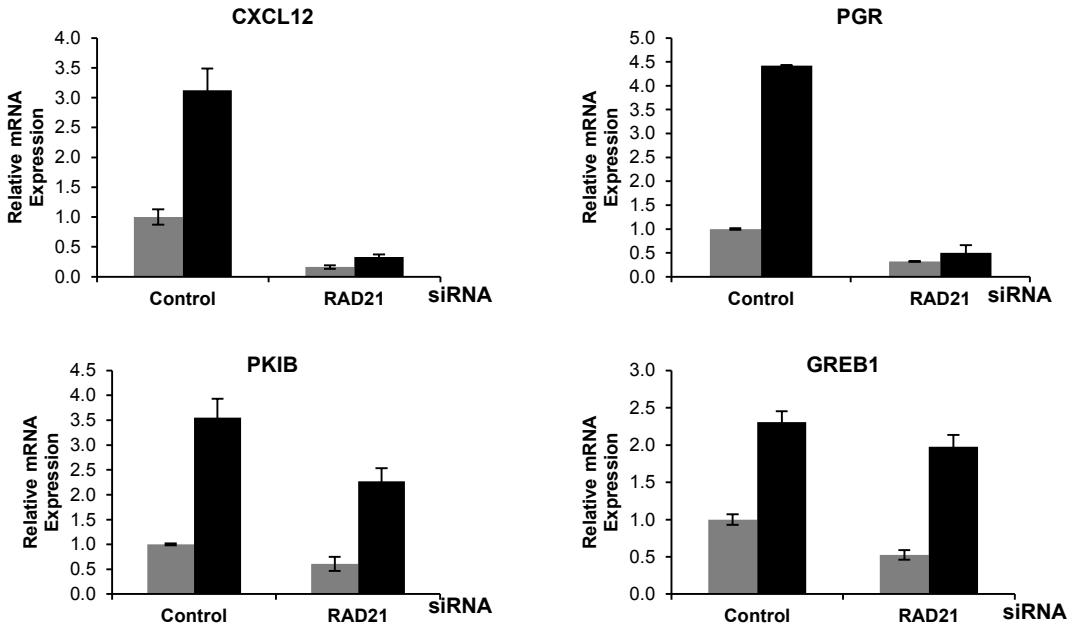

B

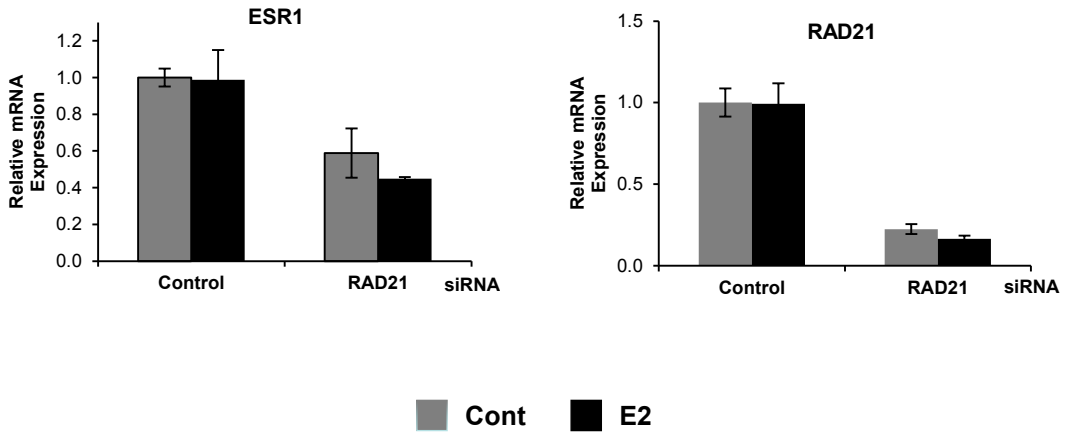

Supplementary Figure 2

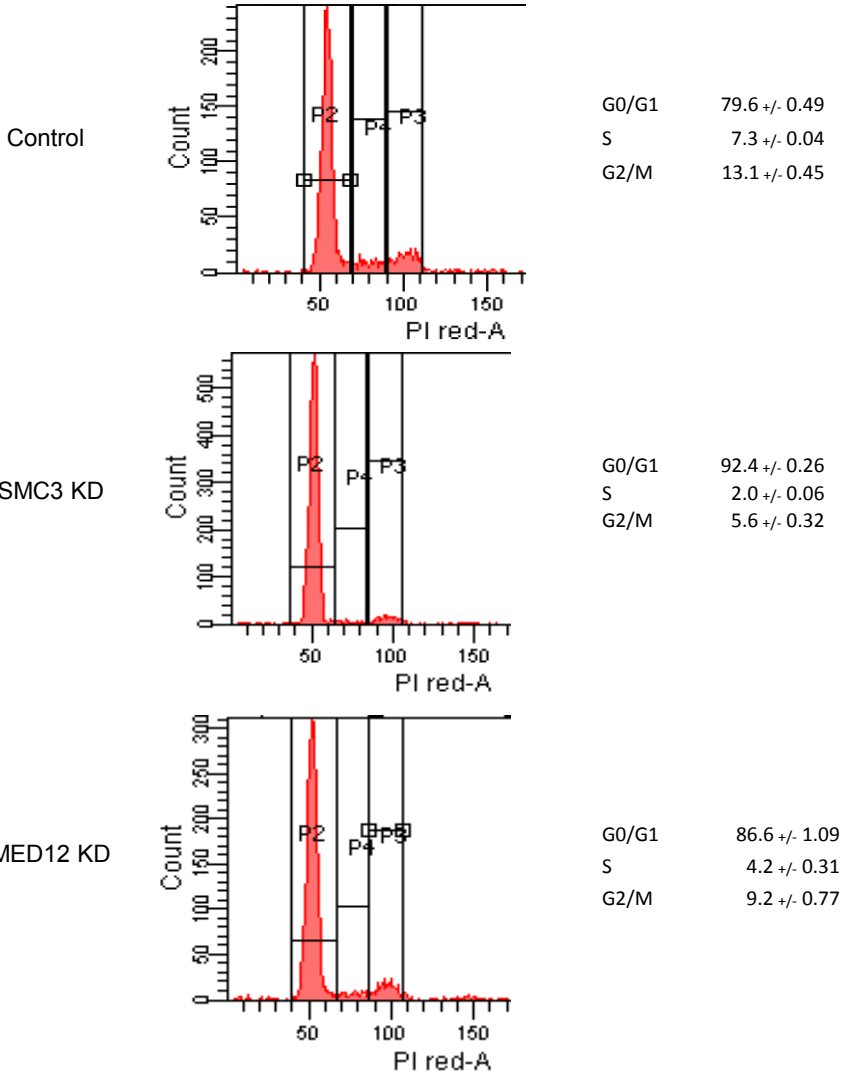

Supplement: 1756-8935-5-13-S1.pdf [file 1756-8935-5-13-S1.pdf]
